# Supplementary material
Source: PubMed Central journal article supplement (PMC3546816)
Supplement: NIHMS430384-supplement-1.pdf [file NIHMS430384-supplement-1.pdf]

**Supplemental Material**

Vulnerability to temperature-related mortality in Seoul, Korea

Ji-Young Son, Jong-Tae Lee, G. Brooke Anderson, and Michelle L. Bell

*Environmental Research Letters*

Supplemental Figure 1. Risk of mortality for (A) heat (comparison of 99th vs. 90th percentile of mean temperature) and (B) cold (comparison of 1st vs. 10th percentile of mean temperature) for different lag structures.

*Note:* Lag 0 represents exposure on the same day. Other lags represent exposure averaged across the same day and previous days.

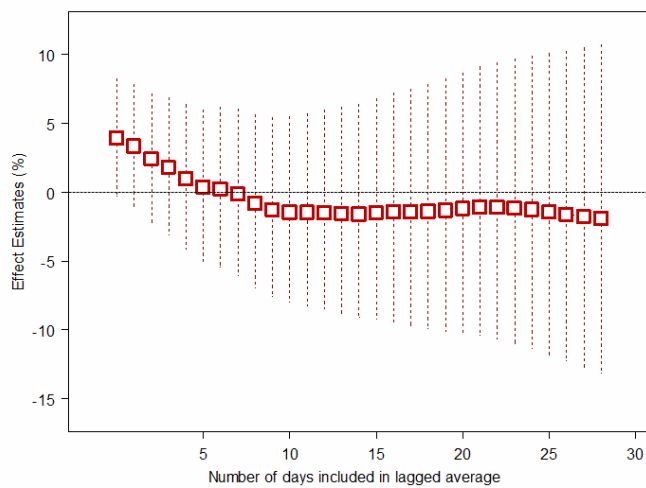

(A)

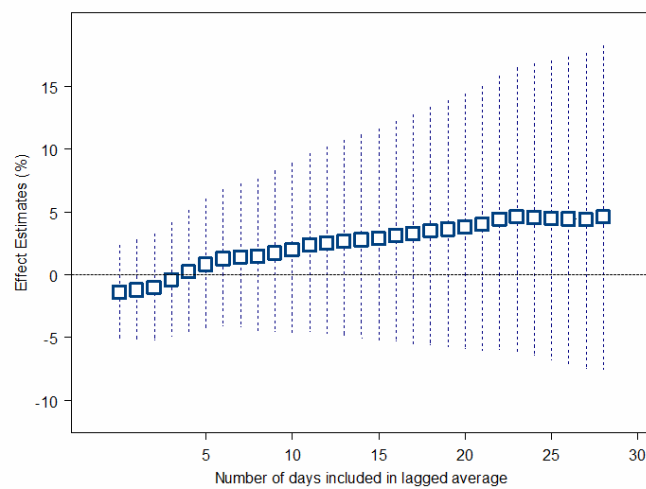

(B)

Supplemental Table 1. Summary statistics of the study population, by sex

|                                  | Male                   | Female                   | Total                   |
|----------------------------------|------------------------|--------------------------|-------------------------|
|                                  | N (% of male subjects) | N (% of female subjects) | N (% of total subjects) |
| All observations                 | 145,902                | 126,003                  | 272,040                 |
| Cause of death                   |                        |                          |                         |
| Respiratory                      | 9,017 (6.2%)           | 6,809 (5.4%)             | 15,840 (5.8%)           |
| Cardiovascular                   | 37,280 (25.6%)         | 37,326 (29.6%)           | 74,629 (27.4%)          |
| Other non-accidental             | 99,605 (68.3%)         | 81,868 (65.0%)           | 181,571 (66.7%)         |
| Age                              |                        |                          |                         |
| 0-14                             | 2,406 (1.7%)           | 1,943 (1.5%)             | 4,349 (1.6%)            |
| 15-64                            | 64,113 (43.9%)         | 26,841 (21.3%)           | 90,954 (33.4%)          |
| 65-74                            | 36,796 (25.2%)         | 23,171 (18.4%)           | 59,967 (22.0%)          |
| ≥75                              | 42,587 (29.2%)         | 74,048 (58.8%)           | 116,770 (42.9%)         |
| Education (for those ≥ 20 years) |                        |                          |                         |
| None                             | 12,800 (8.9%)          | 52,311 (42.3%)           | 65,213 (24.4%)          |
| ≤12 years                        | 101,975 (71.3%)        | 65,198 (52.7%)           | 167,204 (62.6%)         |
| >12 years                        | 27,240 (19.0%)         | 5,317 (4.3%)             | 32,557 (12.2%)          |
| Unknown                          | 1,112 (0.8%)           | 990 (0.8%)               | 2,104 (0.8%)            |
| Place of death                   |                        |                          |                         |
| Out of hospital                  | 59,551 (40.9%)         | 62,747 (49.9%)           | 122,407 (45.1%)         |
| In hospital                      | 86,106 (59.1%)         | 63,036 (50.1%)           | 149,168 (54.9%)         |

Supplemental Table 2. Summary statistics of the study population, by age

|                                         | 0-14<br>N (% of<br>subjects 0-<br>14y) | 15-64<br>N (% of<br>subjects 15-<br>64y) | 65-74<br>N (% of<br>subjects 65-<br>74y) | $\geq 75$<br>N (% of<br>subjects $\geq 75$ y) | Total<br>N (% of total<br>subjects) |
|-----------------------------------------|----------------------------------------|------------------------------------------|------------------------------------------|-----------------------------------------------|-------------------------------------|
| All observations                        | 4,349 (1.6%)                           | 90,954<br>(33.4%)                        | 59,967<br>(22.0%)                        | 116,770<br>(42.9%)                            | 272,040<br>(100%)                   |
| Cause of death                          |                                        |                                          |                                          |                                               |                                     |
| Respiratory                             | 171 (3.9%)                             | 2,490 (2.7%)                             | 3,369 (5.6%)                             | 9,810 (8.4%)                                  | 15,840 (5.8%)                       |
| Cardiovascular                          | 185 (4.3%)                             | 20,059<br>(22.1%)                        | 18,643<br>(31.1%)                        | 35,742 (30.6%)                                | 74,629<br>(27.4%)                   |
| Other non-accidental                    | 3,993<br>(91.8%)                       | 68,405<br>(75.2%)                        | 37,955<br>(63.3%)                        | 71,218 (61.0%)                                | 181,571<br>(66.7%)                  |
| Sex                                     |                                        |                                          |                                          |                                               |                                     |
| Male                                    | 2,406<br>(55.3%)                       | 64,113<br>(70.5%)                        | 36,796<br>(61.4%)                        | 42,587 (36.5%)                                | 145,902<br>(53.6%)                  |
| Female                                  | 1,943<br>(44.7%)                       | 26,841<br>(29.5%)                        | 23,171<br>(38.6%)                        | 74,048 (63.4%)                                | 126,003<br>(46.3%)                  |
| Education<br>(% of those $\geq 20$ yrs) |                                        |                                          |                                          |                                               |                                     |
| None                                    | -                                      | 3,930 (4.3%)                             | 9,565<br>(16.0%)                         | 51,788 (44.4%)                                | 65,213<br>(24.4%)                   |
| $\leq 12$ years                         | -                                      | 69,744<br>(76.6%)                        | 41,724<br>(69.6%)                        | 56,269 (48.2%)                                | 167,204<br>(62.6%)                  |
| $> 12$ years                            | -                                      | 16,688<br>(18.3%)                        | 8,227<br>(13.7%)                         | 7,652 (6.6%)                                  | 32,557<br>(12.2%)                   |
| Unknown                                 | -                                      | 592 (0.7%)                               | 451 (0.8%)                               | 1,061 (0.9%)                                  | 2,104 (0.8%)                        |
| Place of death                          |                                        |                                          |                                          |                                               |                                     |
| Out of hospital                         | 913 (21.8%)                            | 28,714<br>(31.6%)                        | 24,250<br>(40.5%)                        | 68,530 (58.8%)                                | 122,407<br>(45.1%)                  |
| In hospital                             | 3,278<br>(78.2%)                       | 62,131<br>(68.4%)                        | 35,647<br>(59.5%)                        | 48,112 (41.3%)                                | 149,168<br>(54.9%)                  |
